# Supplementary material
Source: PubMed Central journal article supplement (PMC4655163)
Supplement: NIHMS726580-supplement-1.pdf [file NIHMS726580-supplement-1.pdf]

1 **Supplemental Materials**

2

3 **Supplemental Table 1.** List of *IL-17* and *IL-17R* genes in lampreys

| Lamprey species        | Gene name          | Source        | Scaffold/Contig<br>/Accession no. | Start   | Stop    | Strand |
|------------------------|--------------------|---------------|-----------------------------------|---------|---------|--------|
| Sea Lamprey            | <i>IL-17D.2</i>    | Genome        | Sca2697                           | 18751   | 18990   | F      |
| Sea Lamprey            | <i>IL-17B</i>      | Genome        | Sca995                            | 164419  | 164667  | R      |
| Sea Lamprey            | <i>IL-17E</i>      | Genome        | Sca1481                           | 2056    | 2310    | F      |
| Sea Lamprey            | <i>IL-17D.1</i>    | Cloning       | KR059941                          |         |         |        |
| Sea Lamprey            | <i>IL-17C</i>      | Transcriptome | KR059956                          |         |         |        |
| Sea Lamprey            | <i>IL-17RA.1</i>   | Cloning       | KR059942                          |         |         |        |
| Sea Lamprey            | <i>IL-17RA.2</i>   | Cloning       | KR059943                          |         |         |        |
| Sea Lamprey            | <i>IL-17RA.3</i>   | Cloning       | KR059944                          |         |         |        |
| Sea Lamprey            | <i>IL-17RF</i>     | Genome        | Sca1205                           | 18952   | 19704   | R      |
| Sea Lamprey            | <i>IL-17RE/RC*</i> | Genome        | Sca14325                          | 1319    | 6044    | F      |
| Sea Lamprey            | <i>IL-17RD*</i>    | Genome        | Sca563                            | 63041   | 63220   | R      |
| European brook lamprey | <i>IL-17D.2</i>    | Transcriptome | KR059945                          |         |         |        |
| European brook lamprey | <i>IL-17B</i>      | Transcriptome | KR059946                          |         |         |        |
| European brook lamprey | <i>IL-17E</i>      | Transcriptome | KR059947                          |         |         |        |
| European brook lamprey | <i>IL-17D.1</i>    | Transcriptome | KR059948                          |         |         |        |
| European brook lamprey | <i>IL-17C</i>      | Transcriptome | KR059949                          |         |         |        |
| European brook lamprey | <i>IL-17RA.1</i>   | Transcriptome | KR059950                          |         |         |        |
| European brook lamprey | <i>IL-17RA.2</i>   | Transcriptome | KR059951                          |         |         |        |
| European brook lamprey | <i>IL-17RA.3</i>   | Transcriptome | KR059952                          |         |         |        |
| European brook lamprey | <i>IL-17RF</i>     | Transcriptome | KR059953                          |         |         |        |
| European brook lamprey | <i>IL-17RE/RC</i>  | Transcriptome | KR059954                          |         |         |        |
| European brook lamprey | <i>IL-17RD</i>     | Transcriptome | KR059955                          |         |         |        |
| Japanese Lamprey       | <i>IL-17D.2</i>    | Genome        | Sca00061                          | 1103835 | 1104062 | F      |
| Japanese Lamprey       | <i>IL-17B.1</i>    | Genome        | Sca00085                          | 123306  | 124634  | R      |
| Japanese Lamprey       | <i>IL-17B.2</i>    | Genome        | Sca00265                          | 24268   | 25632   | R      |
| Japanese Lamprey       | <i>IL-17B.3</i>    | Genome        | Sca00321                          | 463705  | 463929  | F      |
| Japanese Lamprey       | <i>IL-17E</i>      | Genome        | Sca00508                          | 279777  | 280001  | F      |
| Japanese Lamprey       | <i>IL-17D.1</i>    | Genome        | Sca00087                          | 1656028 | 1658572 | F      |
| Japanese Lamprey       | <i>IL-17C.1</i>    | Genome        | Sca02272                          | 3558    | 4163    | F      |
| Japanese Lamprey       | <i>IL-17C.2</i>    | Genome        | Con116163                         | 186     | 419     | R      |
| Japanese Lamprey       | <i>IL-17RA.1</i>   | Genome        | Sca415                            | 633     | 4676    | F      |
| Japanese Lamprey       | <i>IL-17RA.2</i>   | Genome        | Sca00374                          | 461849  | 484143  | F      |
| Japanese Lamprey       | <i>IL-17RA.3</i>   | Genome        | Sca00138                          | 1586662 | 1590219 | F      |
| Japanese Lamprey       | <i>IL-17RF</i>     | Genome        | Con062298                         | 2       | 703     | F      |
| Japanese Lamprey       | <i>IL-17RE/RC</i>  | Genome        | Sca00976                          | 58113   | 75959   | R      |
| Japanese Lamprey       | <i>IL-17RD</i>     | Genome        | Sca00003                          | 3120453 | 3209856 | R      |

4 Note: \* The sequence encoding the conserved SEFIR domain was not found due to  
5 incompleteness of the genome sequence.

6

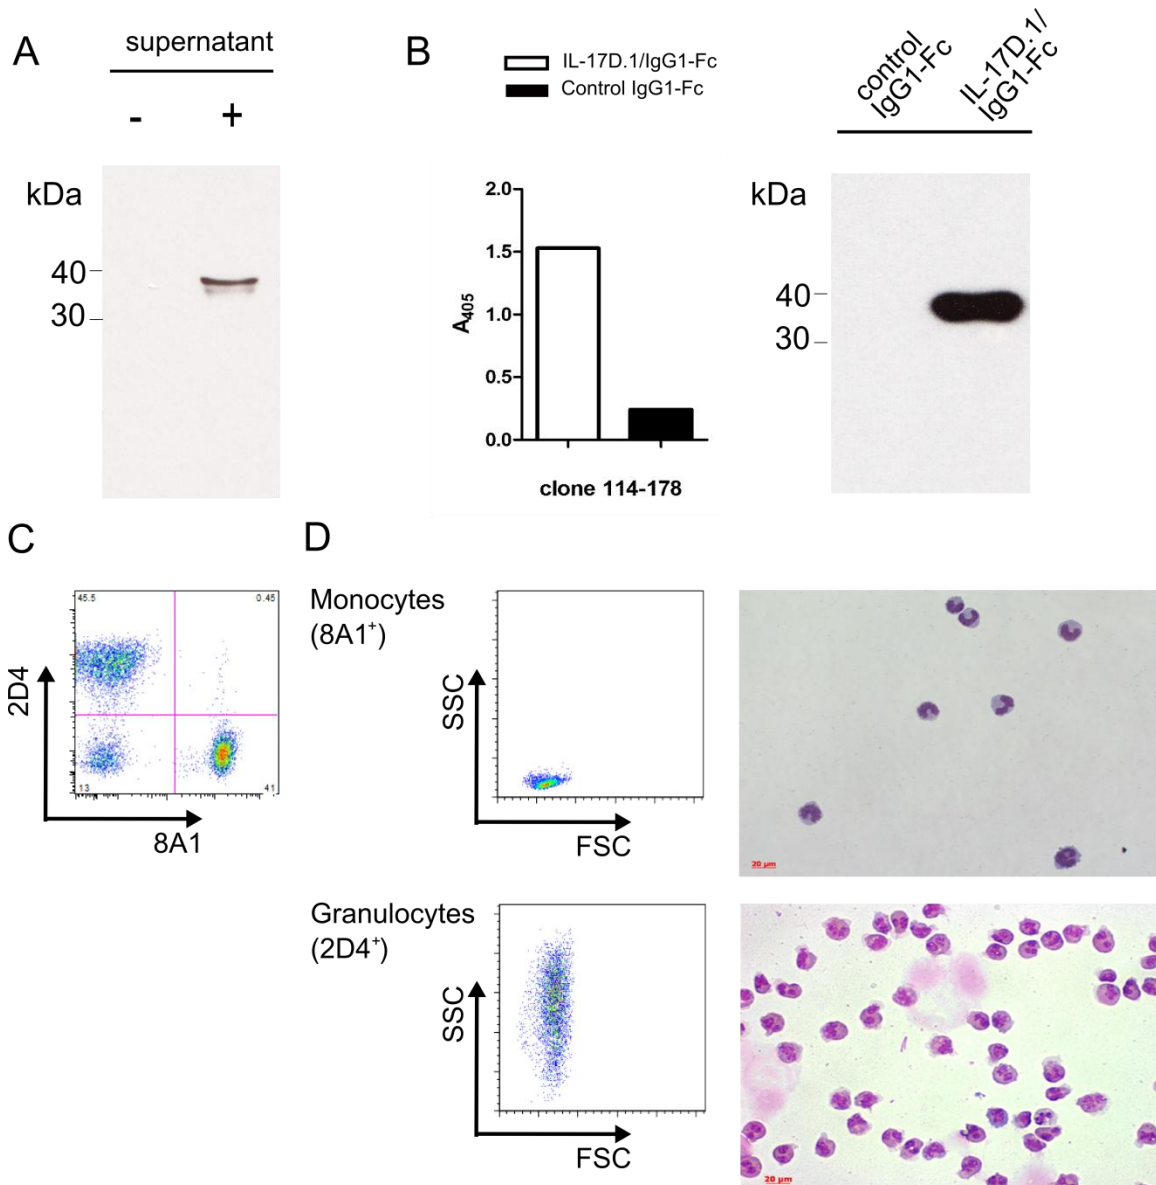

7  
8  
9 **Supplemental Figure 1.** Production and characterization of anti-IL-17D.1, anti-  
10 monocyte and anti-granulocyte mAbs. (A) Production of IL-17D.1/IgG1-Fc fusion  
11 protein. HEK-293T cells were transfected with control plasmids (-) or plasmids  
12 expressing IL-17D.1/IgG1-Fc fusion protein (+). Supernatants were collected after 60  
13 hours and resolved on reducing SDS-PAGE gel before Western blotting. (B) Reactivity  
14 of a mouse anti-IL-17D.1 mAb (clone114-178) with control IgG1-Fc and IL-17D.1/IgG1-  
15 Fc proteins, measured by ELISA and Western blot. (C) Cell surface staining of adult  
16 lamprey blood leukocytes with anti-monocyte (8A1) and anti-granulocyte (2D4)  
17 antibodies. Cells were gated using FSC-A vs FSC-H for singlets, and negative propidium  
18 iodide staining for live cells. (D) Analysis of 8A1<sup>+</sup> monocytes and 2D4<sup>+</sup> granulocytes by  
19 flow cytometry (FSC/SSC) and Wright-Giemsa stain. scale bar, 20 μm.  
20

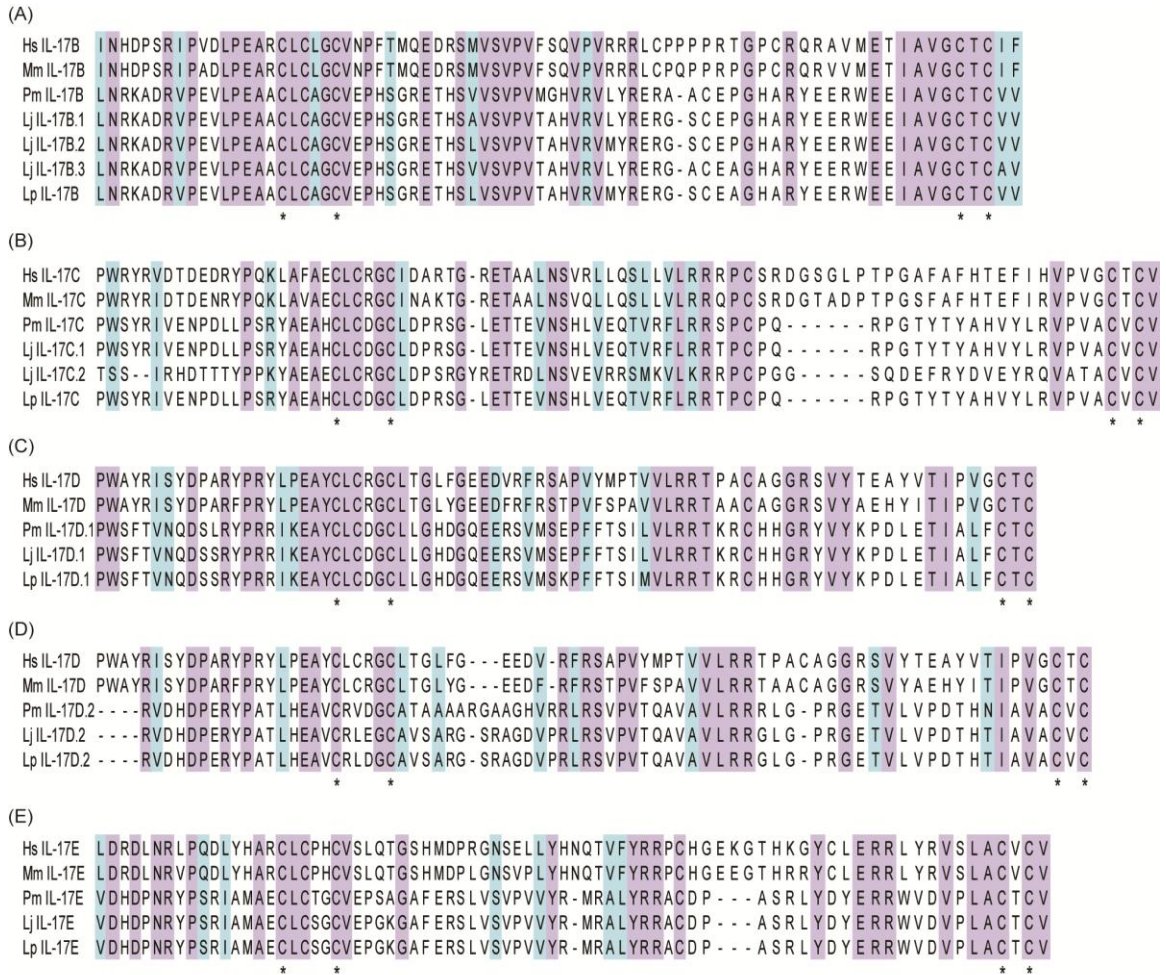

21

22 **Supplemental Figure 2.** Sequence alignment of C-terminal residues of lamprey IL-17s  
 23 with mammalian IL-17s. The alignment was achieved by using ClustalW. Identical  
 24 residues are boxed in purple and highly conserved residues in blue. The four cysteines  
 25 that may form the cystine-knot structure in the IL-17 family are marked with asterisks.  
 26 Pm IL-17s: sea lamprey IL-17s; Lj IL-17s: Japanese lamprey IL-17s; Lp: European brook  
 27 lamprey IL-17s. The accession numbers for sequences used in this analysis are listed in  
 28 Fig. 1.

29

30

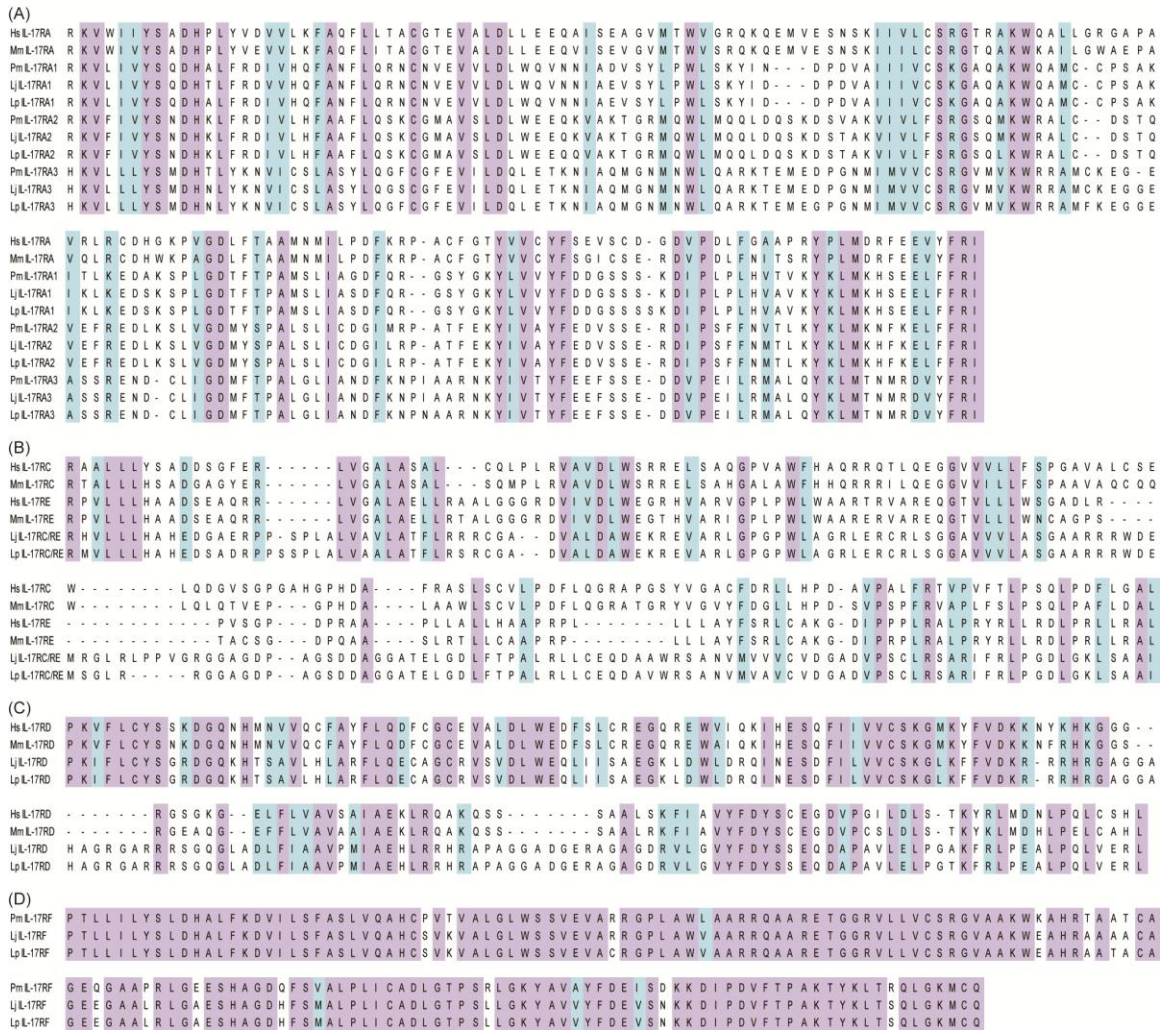

31

32 **Supplemental Figure 3.** Sequence alignment of intracellular SEFIR domains of lamprey  
33 IL-17Rs with mammalian IL-17Rs. The alignment was achieved using ClustalW.  
34 Identical residues are boxed in purple and highly conserved residues in blue. Pm IL-17Rs:  
35 sea lamprey IL-17Rs; Lj IL-17Rs: Japanese lamprey IL-17Rs; Lp: European brook  
36 lamprey IL-17Rs. Note that lamprey IL-17R4 sequences are distinct and do not group  
37 with mammalian IL-17R member. The accession numbers for sequences used in this  
38 analysis are listed in Fig. 5.
